# Supplementary material for: Electrophysiological correlates of top-down attentional modulation in olfaction
Source: PubMed Central journal article supplement (PMC6426950; doi:10.1038/s41598-019-41319-6), 2019-03-20
Supplement: 41598_2019_41319_MOESM1_ESM.pdf [file 41598_2019_41319_MOESM1_ESM.pdf]

## Supplementary Information

# Electrophysiological correlates of top-down attentional modulation in olfaction

**Archana K. Singh<sup>1,2\*</sup>, Kazushige Touhara<sup>1,2</sup>, and Masako Okamoto<sup>1,2\*</sup>**

**1** Department of Applied Biological Chemistry, Graduate School of Agricultural and Life Sciences, The University of Tokyo, Tokyo 113-8657, Japan

**2** ERATO Touhara Chemosensory Signal Project, JST, The University of Tokyo, Tokyo 113-8657, Japan

\*sine.arc@gmail.com,  
masakookamoto3@gmail.com

**Supplementary Table S1:** Open Essence scores for 31 Participants. The columns show subject-id, gender, open essence score, and age, respectively.

|     | Gender | Open Essence Score | Age  |
|-----|--------|--------------------|------|
| S1  | F      | 11                 | 33   |
| S2  | F      | 12                 | 21   |
| S3  | M      | 8                  | 22   |
| S4  | F      | 10                 | 18   |
| S5  | M      | 10                 | 20   |
| S6  | F      | 7                  | 27   |
| S7  | M      | 10                 | 22   |
| S8  | M      | 10                 | 23   |
| S9  | M      | 10                 | 22   |
| S10 | F      | 12                 | 26   |
| S11 | M      | 12                 | 21   |
| S12 | F      | 8                  | 40   |
| S13 | F      | 11                 | 38   |
| S14 | M      | 11                 | 21   |
| S15 | F      | 11                 | 22   |
| S16 | M      | 8                  | 24   |
| S17 | M      | 9                  | 26   |
| S18 | M      | 8                  | 22   |
| S19 | M      | 10                 | 20   |
| S20 | M      | 11                 | 23   |
| S21 | F      | 11                 | 23   |
| S22 | F      | 10                 | 20   |
| S23 | M      | 11                 | 22   |
| S24 | F      | 9                  | 20   |
| S25 | M      | 10                 | 20   |
| S26 | M      | 10                 | 26   |
| S27 | M      | 10                 | 20   |
| S28 | M      | 10                 | 24   |
| S29 | M      | 9                  | 21   |
| S30 | M      | 10                 | 28   |
| S31 | F      | 11                 | 21   |
|     | Median | 10                 | 22   |
|     | Mean   | 10                 | 23.7 |
|     | SD     | 1.3                | 5.1  |

**Supplementary Table S2:** Statistics for electrodes with significant effects ( $\text{fdr} < 0.05$ ), PAT – PNA corresponding to P3 OERP component. The columns represent, index, electrode label, observed t-statistic, and q-value, respectively.

|    | <b>Electrode</b> | <b>t</b> | <b>q-value</b> |
|----|------------------|----------|----------------|
| 1  | F5               | 1.8376   | 0.0015         |
| 2  | F7               | 1.4221   | 0.0019         |
| 3  | FT7              | 1.5588   | 0.0013         |
| 4  | FC5              | 1.3730   | 0.0048         |
| 5  | C5               | 1.5683   | 0.0070         |
| 6  | T7               | 2.2968   | 0.0008         |
| 7  | TP7              | 1.2976   | 0.0044         |
| 8  | CP5              | 0.9917   | 0.0250         |
| 9  | P1               | 1.0833   | 0.0368         |
| 10 | P3               | 2.8581   | 0.0013         |
| 11 | P5               | 2.2532   | 0.0008         |
| 12 | P7               | 1.6117   | 0.0012         |
| 13 | P9               | 1.4661   | 0.0072         |
| 14 | PO7              | 1.7236   | 0.0015         |
| 15 | PO3              | 1.0720   | 0.0094         |
| 16 | O1               | 0.8335   | 0.0464         |
| 17 | Oz               | 0.8787   | 0.0233         |
| 18 | AFz              | 0.9931   | 0.0410         |
| 19 | FC2              | 0.8449   | 0.0390         |
| 20 | P4               | 1.0522   | 0.0325         |
| 21 | P6               | 1.3237   | 0.0064         |
| 22 | PO8              | 0.6636   | 0.0406         |

**Supplementary Table S3:** Statistics for electrodes with significant effects ( $\text{fdr} < 0.05$ ), HAT – HNA corresponding to P3 OERP component. The columns represent, index, electrode label, observed t-statistic, and q-value, respectively. For P2 OERP component, the significant effect was observed at only one electrode, PO8 ( $t = 1.4$ ,  $q\text{-value} = 0.02$ )

|    | <b>Electrode</b> | <b>t</b> | <b>q-value</b> |
|----|------------------|----------|----------------|
| 1  | F3               | 0.7130   | 0.0449         |
| 2  | FC3              | 0.9893   | 0.0143         |
| 3  | FC1              | 1.0159   | 0.0052         |
| 4  | C1               | 1.3941   | 0.0002         |
| 5  | C3               | 0.7718   | 0.0276         |
| 6  | C5               | 1.8786   | 0.0002         |
| 7  | TP7              | 0.8365   | 0.0231         |
| 8  | CP5              | 0.8376   | 0.0151         |
| 9  | CP3              | 1.3772   | 0.0006         |
| 10 | CP1              | 1.2586   | 0.0128         |
| 11 | P1               | 1.2955   | 0.0004         |
| 12 | P3               | 1.6123   | 0.0004         |
| 13 | P5               | 0.6622   | 0.0276         |
| 14 | P7               | 1.3508   | 0.0067         |
| 15 | P9               | 1.0622   | 0.0084         |
| 16 | PO7              | 0.8906   | 0.0095         |
| 17 | PO3              | 1.2825   | 0.0045         |
| 18 | O1               | 1.0919   | 0.0116         |
| 19 | Oz               | 0.8367   | 0.0093         |
| 20 | POz              | 1.9349   | 0.0002         |
| 21 | Pz               | 1.4810   | 0.0004         |
| 22 | CPz              | 0.9749   | 0.0050         |
| 23 | FC4              | 1.5979   | 0.0013         |
| 24 | C4               | 0.9793   | 0.0045         |
| 25 | CP6              | 1.0502   | 0.0145         |
| 26 | CP4              | 0.8852   | 0.0232         |
| 27 | CP2              | 1.7143   | 0.0002         |
| 28 | P2               | 1.7266   | 0.0002         |
| 29 | P4               | 1.9916   | 0.0002         |
| 30 | P6               | 1.4348   | 0.0076         |
| 31 | P8               | 0.8401   | 0.0212         |
| 32 | P10              | 0.6245   | 0.0179         |
| 33 | PO8              | 1.6561   | 0.0006         |
| 34 | PO4              | 1.0806   | 0.0063         |

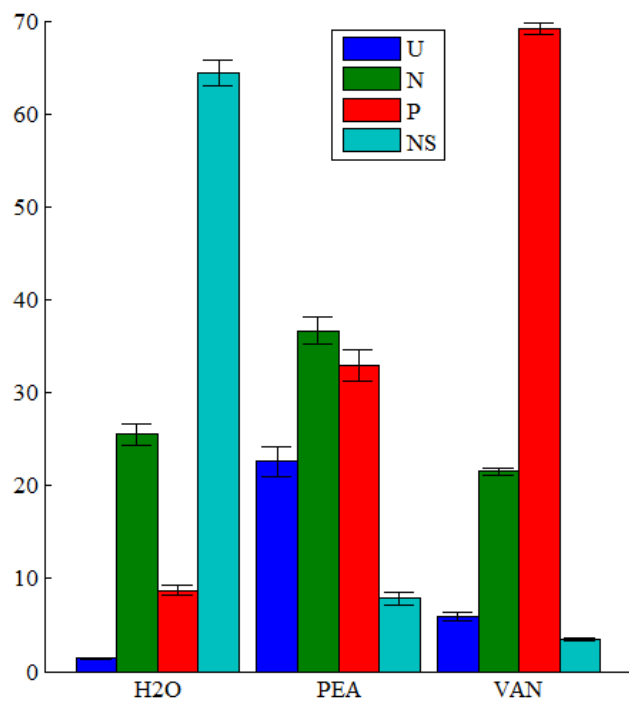

**Supplementary Figure S1. The summary of pleasantness ratings obtained during EEG trials for HAT, PAT, and VAT conditions.** The bars show Mean  $\pm$  SD of the percentage of ratings obtained (N = 31). The ratings U, N, P, and NS represent ‘Unpleasant’, ‘Neutral’, ‘Pleasant’, and ‘No Smell’, respectively.

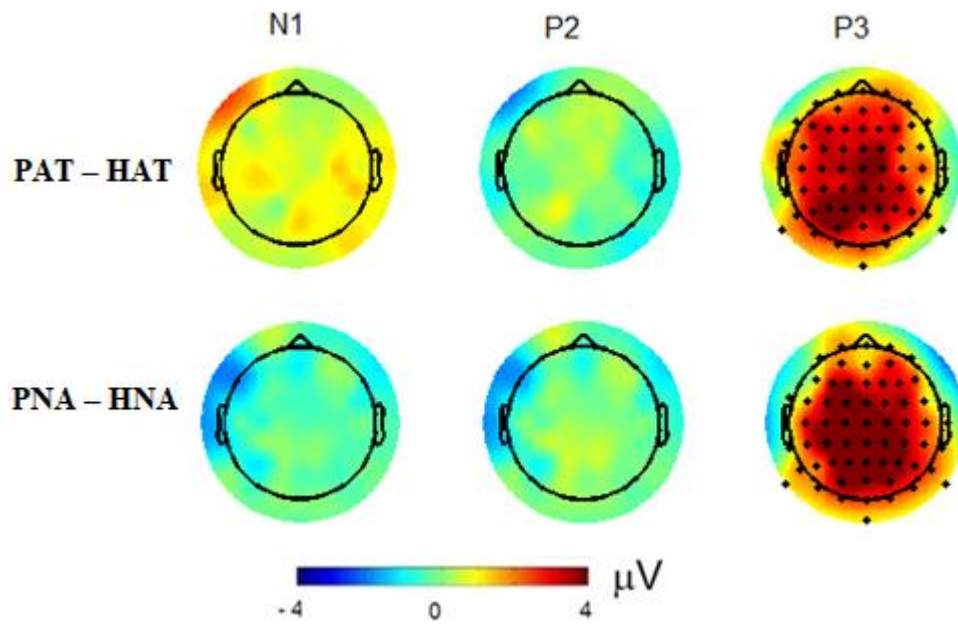

**Supplementary Figure S2. Topography of difference in attentional modulation in N1, P2, P3 peak amplitudes: odor versus odorless.** The top and bottom panel shows the amplitude differences in PAT versus HAT, PNA versus HNA, contrasts respectively. The electrodes with the significant differences are marked in black dots ( $\text{fdr} < 0.05$ ).

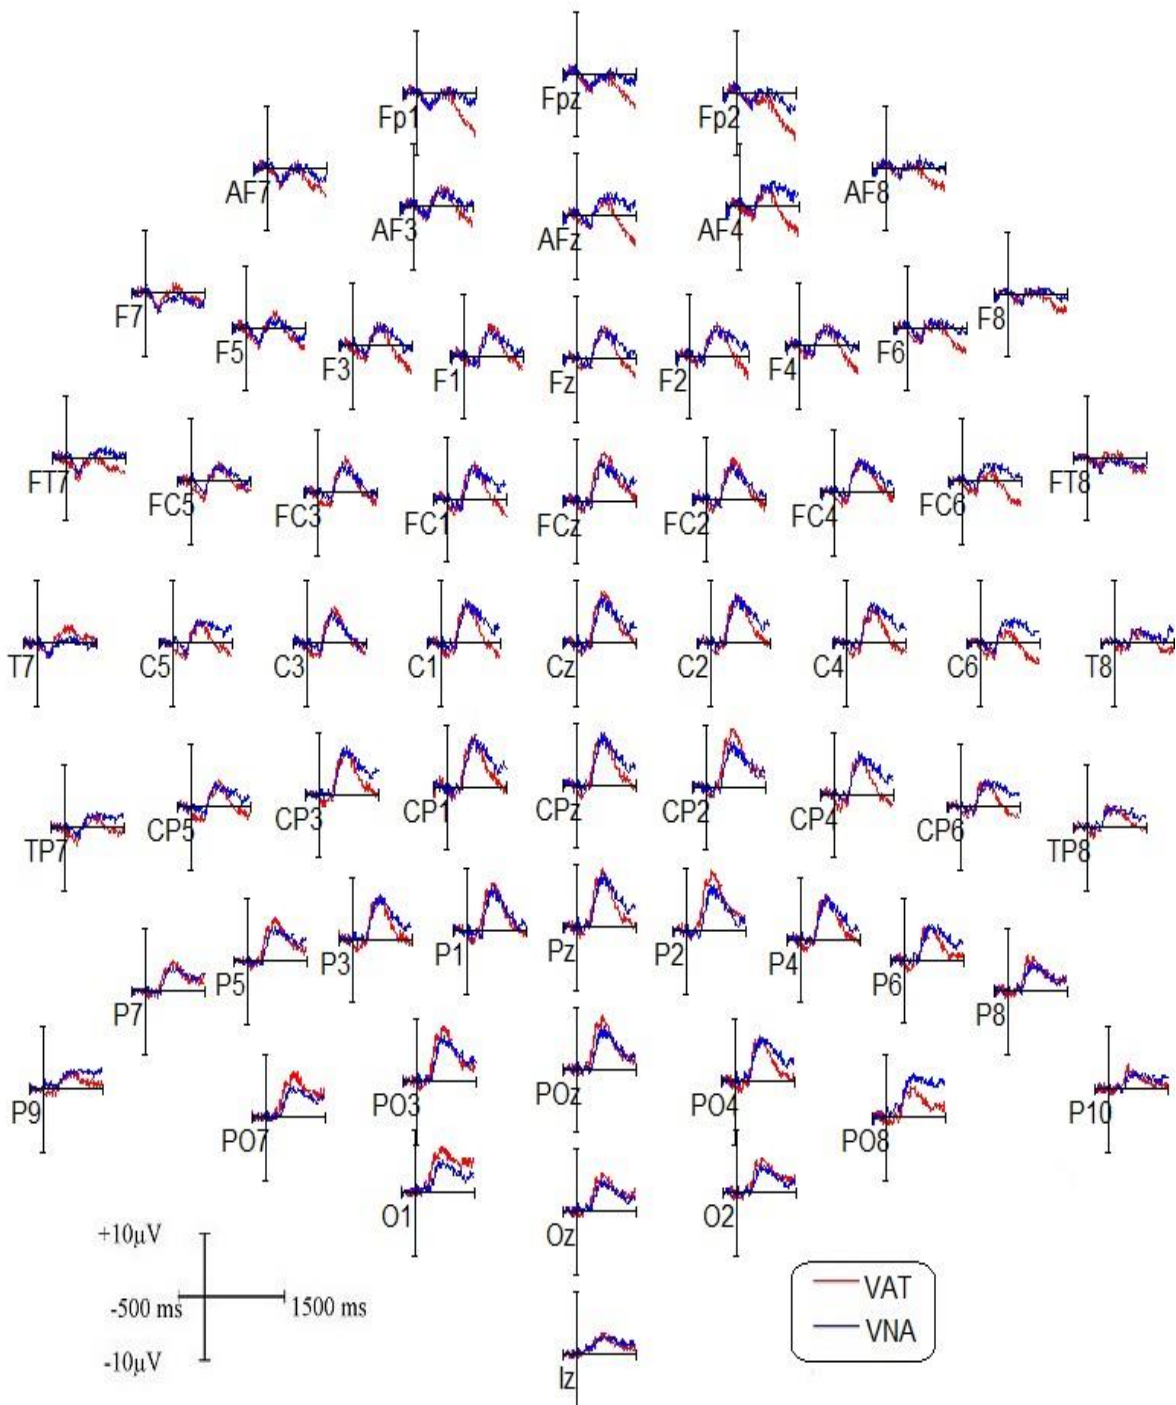

**Supplementary Figure S3. OERP for VAN conditions.** ERP waveforms for VAN-AT and VAN-NA from 64 electrodes are shown in red and blue lines respectively.

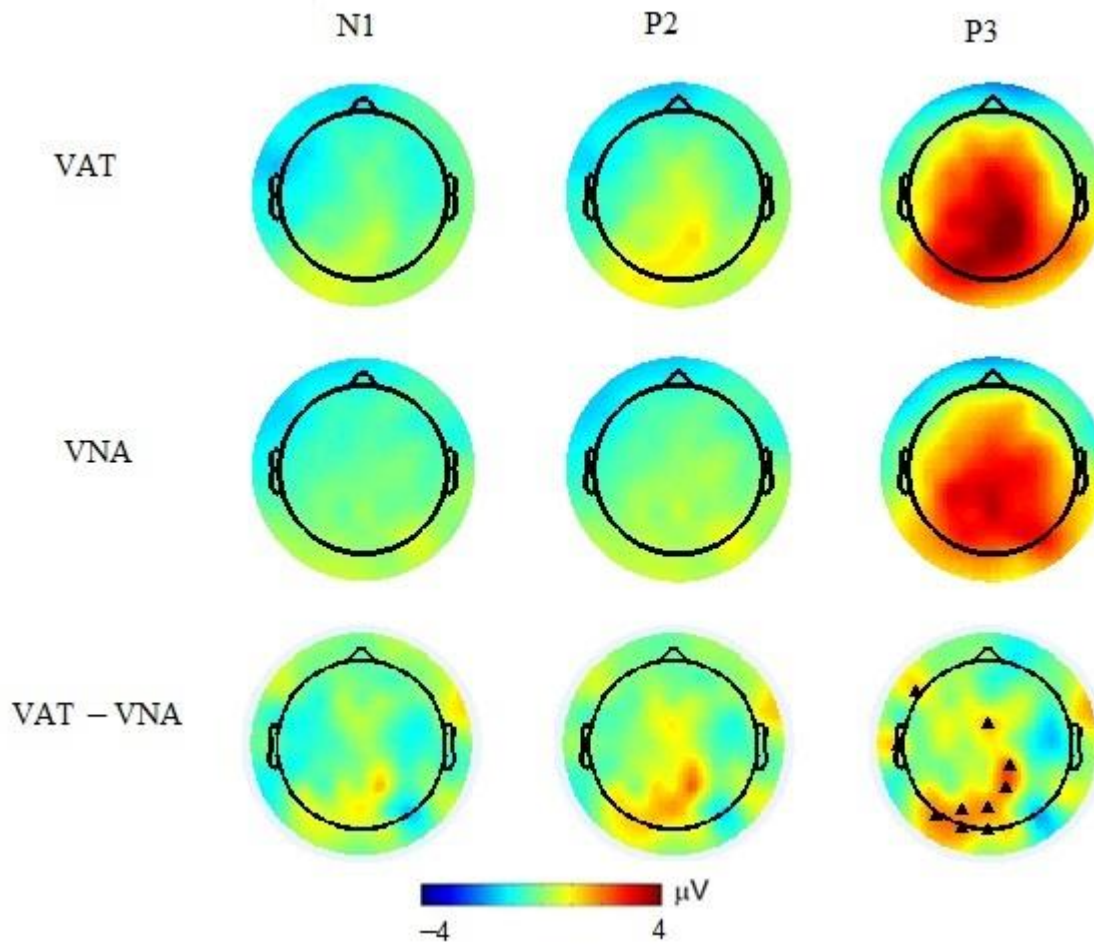

**Supplementary Figure S4. The topographic plots of VAN conditions.** The bottom most panel shows the amplitude differences (VAT - VNA); the electrodes with greater VAT than VNA amplitude ( $P < 0.05$ , Uncorrected) are marked in black triangles for P3 OERP component.



## Supplementary Discussion

### Preliminary OERP Analysis with Vanillin stimulus

One limitation of this study is that it focuses only on single odor stimulus, PEA, which was found to be neutral by most participants. In response to a suggestion from one of the reviewers, we examined (from an exploratory aspect) the differences in top-down modulation effects with a hedonic odor stimulus such as VAN (rated as pleasant by most participants)

The VAN odor was included as filler stimulus in a few trials in between the main odor stimulus (PEA) and odorless control stimulus (H<sub>2</sub>O) to prevent the predictability of main odor stimulus, which may create a potential response bias (Olofsson et al., 2014). Only few filler trials (12 each for VAT and VNA condition) were used to control response bias without lengthening EEG recording and adding subjects' fatigue. After removing noisy trials, the average number (Mean  $\pm$  SD) of remaining trials was  $10 \pm 1$  per condition, which is smaller than the number of trials recommended for a reliable statistical analysis (Hummel and Kobal, 2002).

The OERP waveforms show greater amplitude for VAT than VNA in middle and right central-parietal (CP2, P2 and POz), left frontal-temporal (F7, T7) and left parietal (P07, PO3 and O1) electrodes as shown by their waveforms in the time window of P3 component (Supplementary Fig. S3). The topographic patterns are shown in Supplementary Figure S4. The statistical test of VAT – VNA contrast did not show any significant electrodes ( $fdr < 0.05$ ). Considering the exploratory purpose of this analysis, we marked the electrodes with greater VAT than VNA amplitude for P3 component using a more inclusive uncorrected p-value threshold,  $P < 0.05$ .

The effect in left side of the scalp (F7, T7, PO7, PO3 and O1) was also shown in the case of PEA (Fig.2 and Fig.3, main text), but the effect in the middle and right side of the scalp (CP2, P2 and POz) appears only for VAN. This difference in the topographic pattern of attentional modulation in olfaction may be attributed to the pleasantness, a stimulus-specific (bottom-up) factor, which was apparently greater in VAN than in PEA (Supplementary Figure S1).

However, as mentioned above, these findings are based on a preliminary analysis with different statistical threshold and stimulus frequency for VAN than PEA. Further experimentation with sufficient number of trials and more variety of odors will be helpful for a more objective examination and to provide a clearer perspective on how the hedonic perception of odors may interact with top-down attentional modulation that we observed in our study.

### References:

1. Olofsson J.K., Time to smell: A cascade model of human olfactory perception based on response-time measurement. *Front. Psychol.* 5, 1–8 (2014)
2. Hummel, T., Kobal, G. *Methods in Chemosensory Research (Frontiers in Neuroscience)*. Chapter 17, 429–444 (CRC Press, 2002)
